# Supplementary material for: The anthropogenic fingerprint on emerging infectious diseases
Source: bioRxiv or medRxiv preprint supplement (doi:10.1101/2024.05.22.24307684), 2024-05-22
Supplement: Supplementary file [file media-4.pdf]

# Supplementary Figures for Gibb et al., “The anthropogenic fingerprint on emerging infectious diseases” (May 2024)

**Supp. Figure 1: Fitted linear fixed effects from hypothesis-driven models for all 31 modelled diseases.** Plots show inferred posterior marginal effects of scaled socio-environmental drivers on outbreak risk, with points and error bars showing posterior marginal mean and 95% credible interval. Results are from multivariable models including all hypothesized drivers under either a broader or stricter criterion derived from the hypothesis generation exercise (Methods, denoted by point colour). All models included a continuous geospatial random effect to account for unmeasured factors shaping spatial risk distribution (Methods).

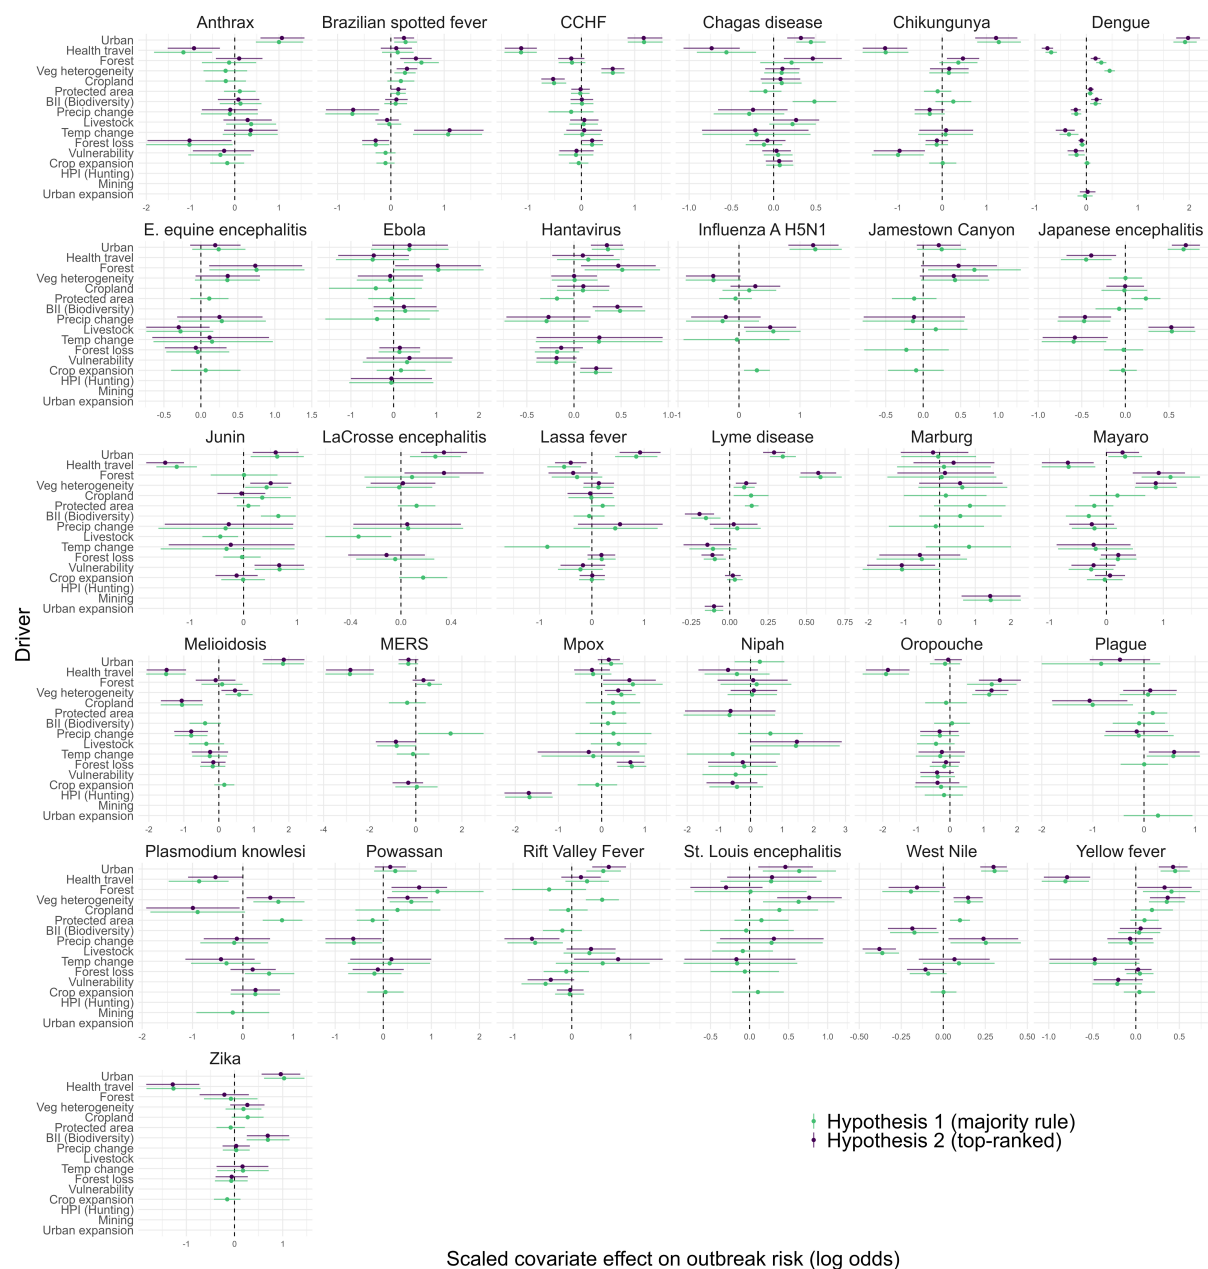

Scaled covariate effect on outbreak risk (log odds)
